# Supplementary material for: Association of C-reactive Protein and Partial Mayo Score With Response to Tofacitinib Induction Therapy: Results From the Ulcerative Colitis Clinical Program
Source: PubMed Central journal article supplement — Inflamm Bowel Dis. 2022 Apr 5;29(1):51–61. doi: 10.1093/ibd/izac061 (PMC9825285; doi:10.1093/ibd/izac061), 2022-04-05
Supplement: izac061_suppl_supplementary_material.pdf [file izac061_suppl_supplementary_material.pdf]

## SUPPLEMENTARY INFORMATION

SUPPLEMENTARY TABLE 1. Assessments of Early Markers of Disease Activity and Clinical and Endoscopic Outcomes in Patients Receiving Tofacitinib 10 mg BID Induction Therapy in the Phase 2, Phase 3 OCTAVE Induction 1 and 2, and OLE Studies. .... 3

SUPPLEMENTARY TABLE 2. Definition of Full Analysis Set for the Phase 3 OCTAVE Induction 1 and 2 and OLE Studies Within the Tofacitinib UC Clinical Program who were included in this analysis..... 5

SUPPLEMENTARY TABLE 3. Demographics and Clinical Characteristics of Tofacitinib Induction Non-Responders at Baseline of OCTAVE Induction 1 and 2, by Clinical Responder Status at Week 16 of Tofacitinib Induction (Non-Responder Imputation Last Observation Carried Forward). .... 6

SUPPLEMENTARY TABLE 4. Univariate Logistic Regression Analysis Results from the Phase 2 Study for CRP and PMS in Patients Receiving Tofacitinib 10 mg BID, by Week 8 Efficacy Endpoints (Full Analysis Set, Observed Case Analysis)..... 7

SUPPLEMENTARY TABLE 5. ROC Analysis For Ability of TNFi To Predict Clinical and Endoscopic Outcomes At Weeks 8 and 16 of Tofacitinib Induction (Full Analysis Set, Observed Case Analysis)..... 8

SUPPLEMENTARY FIGURE 1. A, Overview of the tofacitinib UC clinical program.

Adapted from Winthrop KL, Melmed GY, Vermeire S, et al. *Inflamm Bowel Dis*.

2018;24:2258–65 (in accordance with the CC BY-NC license); B, overview of the patient population in this post hoc analysis. \*Final complete efficacy assessment at Week 8/52.

Treatment continued up to Week 9/53; †Clinical response in OCTAVE Induction 1 and 2

was defined as a decrease from induction study baseline total Mayo score of  $\geq 3$  points and  $\geq 30\%$ , plus a decrease in rectal bleeding subscore of  $\geq 1$  point or an absolute rectal bleeding subscore of 0 or 1; <sup>‡</sup>Study A3921139 (OCTAVE Open) was ongoing at the time of this analysis; <sup>§</sup>Remission was defined as a total Mayo score of  $\leq 2$  with no individual subscore  $>1$ , and a rectal bleeding subscore of 0 (centrally read). BID, twice daily; N, number of patients treated in each treatment group; UC, ulcerative colitis. .... 9

SUPPLEMENTARY FIGURE 2. Evaluation of CRP at Week 4 of the Phase 2 study in patients receiving tofacitinib 10 mg BID (N = 28), stratified by whether patients achieved clinical and endoscopic outcomes at induction Week 8 (full analysis set, observed case analysis). BID, twice daily; CRP, C-reactive protein; N, number of patients with non-missing data in each category; SD, standard deviation. .... 11

SUPPLEMENTARY FIGURE 3. PMS at Week 4 of the Phase 2 study in patients receiving tofacitinib 10 mg BID (N = 28), stratified by whether patients achieved clinical and endoscopic outcomes at induction Week 8 (full analysis set, observed case analysis). BID, twice daily; N, number of patients with non-missing data in each category; PMS, partial Mayo score; SD, standard deviation. .... 12

SUPPLEMENTARY FIGURE 4. ROC curves for prior TNFi failure as a predictor of clinical and endoscopic outcomes (full analysis set, observed case analysis): A, at induction Week 8; B, at induction Week 16. ROC, receiver operating characteristic; TNFi, tumor necrosis factor inhibitor. .... 13

REFERENCES ..... 14

**SUPPLEMENTARY TABLE 1.** Assessments of Early Markers of Disease Activity and Clinical and Endoscopic Outcomes in Patients Receiving Tofacitinib 10 mg BID Induction Therapy in the Phase 2, Phase 3 OCTAVE Induction 1 and 2, and OLE Studies.

| Tofacitinib Induction Therapy                         | OCTAVE                         |        |        |                                                    |        |        |                            |         |
|-------------------------------------------------------|--------------------------------|--------|--------|----------------------------------------------------|--------|--------|----------------------------|---------|
|                                                       | Phase 2 Study<br>(NCT00787202) |        |        | Induction 1 and 2<br>(NCT01465763;<br>NCT01458951) |        |        | OLE Study<br>(NCT01470612) |         |
|                                                       | Week 2                         | Week 4 | Week 8 | Week 2                                             | Week 4 | Week 8 | Week 12                    | Week 16 |
| Potential early markers of disease activity measured: |                                |        |        |                                                    |        |        |                            |         |
| CRP                                                   | -                              | Y      | Y      | -                                                  | Y      | Y      | -                          | -       |
| PMS                                                   | Y                              | Y      | Y      | Y                                                  | Y      | Y      | Y                          | -       |
| Outcomes assessed:                                    |                                |        |        |                                                    |        |        |                            |         |
| Clinical response <sup>†</sup>                        | -                              | -      | Y      | -                                                  | -      | Y      | -                          | Y       |
| Clinical remission <sup>‡</sup>                       | -                              | -      | Y      | -                                                  | -      | Y      | -                          | Y       |
| Endoscopic improvement <sup>§</sup>                   | -                              | -      | Y      | -                                                  | -      | Y      | -                          | Y       |
| Endoscopic remission <sup>¶</sup>                     | -                              | -      | Y      | -                                                  | -      | Y      | -                          | Y       |

<sup>†</sup>Clinical response was defined as a decrease from induction study baseline total Mayo score of  $\geq 3$  points and  $\geq 30\%$ , plus a decrease in rectal bleeding subscore of  $\geq 1$  point or an absolute rectal bleeding subscore of 0 or 1.

<sup>‡</sup>Clinical remission was defined as a total Mayo score of  $\leq 2$  with no individual subscore  $> 1$ .

<sup>§</sup>Endoscopic improvement (defined as mucosal healing per the original Phase 2 and OCTAVE protocols [NCT00787202; NCT01465763; NCT01458951] approved prior to publication of the US Food and Drug Administration draft guidance on the definition of mucosal healing) was defined as a Mayo endoscopic subscore of 0 or 1.

<sup>¶</sup>Endoscopic remission was defined as a Mayo endoscopic subscore of 0.

BID, twice daily; CRP, C-reactive protein; OLE, open-label, long-term extension; PMS, partial Mayo score; Y, yes.

**SUPPLEMENTARY TABLE 2.** Definition of Full Analysis Set for the Phase 3 OCTAVE Induction 1 and 2 and OLE Studies Within the Tofacitinib UC Clinical Program who were included in this analysis.

| Study                                                               | Definition of Full Analysis Set                                                                                                |
|---------------------------------------------------------------------|--------------------------------------------------------------------------------------------------------------------------------|
| OCTAVE Induction 1 and 2<br>(NCT01465763; NCT01458951) <sup>1</sup> | All randomized patients assigned to tofacitinib 10 mg BID                                                                      |
| OLE study<br>(NCT01470612) <sup>2</sup>                             | All induction non-responders who received tofacitinib 10 mg BID in OCTAVE Induction 1 and 2 and received tofacitinib 10 mg BID |

BID, twice daily; OLE, open-label, long-term extension; UC, ulcerative colitis.

**SUPPLEMENTARY TABLE 3.** Demographics and Clinical Characteristics of Tofacitinib Induction Non-Responders at Baseline of OCTAVE Induction 1 and 2, by Clinical Responder Status at Week 16 of Tofacitinib Induction (Non-Responder Imputation Last Observation Carried Forward).

|                                                        | All<br>N = 295 | Complete<br>Non-responder<br>N = 147 | Delayed<br>Responder<br>N = 148 |
|--------------------------------------------------------|----------------|--------------------------------------|---------------------------------|
| Age, y, mean (SD)                                      | 38.9 (13.4)    | 37.4 (13.2)                          | 40.4 (13.5)                     |
| Male, n (%)                                            | 184 (62.4)     | 90 (61.2)                            | 94 (63.5)                       |
| Total Mayo score at baseline, mean (SD) <sup>†</sup>   | 9.2 (1.4)      | 9.4 (1.3)                            | 9.1 (1.4)                       |
| Partial Mayo score at baseline, mean (SD) <sup>†</sup> | 6.6 (1.2)      | 6.7 (1.2)                            | 6.5 (1.2)                       |
| CRP >3 mg/L at baseline, n (%) <sup>‡</sup>            | 198 (67.6)     | 105 (71.4)                           | 93 (63.7)                       |
| Prior TNFi failure, n (%)                              | 181 (61.4)     | 96 (65.3)                            | 85 (57.4)                       |
| Prior immunosuppressant failure, n (%)                 | 235 (79.7)     | 117 (79.6)                           | 118 (79.7)                      |
| Prior corticosteroid failure, n (%)                    | 202 (68.5)     | 104 (70.7)                           | 98 (66.2)                       |
| Oral corticosteroid use at baseline, n (%)             | 116 (39.3)     | 66 (44.9)                            | 50 (33.8)                       |
| Extent of disease, n (%)                               |                |                                      |                                 |
| Proctosigmoiditis                                      | 48 (16.3)      | 25 (17.0)                            | 23 (15.5)                       |
| Left-sided colitis                                     | 107 (36.3)     | 54 (36.7)                            | 53 (35.8)                       |
| Extensive colitis/pancolitis                           | 140 (47.5)     | 68 (46.3)                            | 72 (48.6)                       |

Responder status was determined as of the May 27, 2019 data cut, database not locked.

<sup>†</sup>All, N = 293; complete non-responders, N = 145; delayed responders, N = 148.

<sup>‡</sup>All, N = 293; complete non-responders, N = 147; delayed responders, N = 146.

BID, twice daily; CRP, C-reactive protein; N, number of patients in the group; n, number of patients within the given category; SD, standard deviation; TNFi, tumor necrosis factor inhibitor.

**SUPPLEMENTARY TABLE 4.** Univariate Logistic Regression Analysis Results from the Phase 2 Study for CRP and PMS in Patients Receiving Tofacitinib 10 mg BID, by Week 8 Efficacy Endpoints (Full Analysis Set, Observed Case Analysis).

|                        | CRP (mg/L)   | PMS          | PMS          |
|------------------------|--------------|--------------|--------------|
| Odds Ratio             | Week 4       | Week 2       | Week 4       |
| (95% CI)               | N = 28       | N = 25       | N = 26       |
|                        | 0.73         | 0.70         | 0.57*        |
| Clinical response      | (0.44, 1.19) | (0.45, 1.09) | (0.35, 0.95) |
|                        | 0.58*        | 0.50*        | 0.46*        |
| Clinical remission     | (0.34, 0.99) | (0.29, 0.86) | (0.25, 0.85) |
|                        | 0.80         | 0.63         | 0.65         |
| Endoscopic improvement | (0.49, 1.30) | (0.39, 1.01) | (0.41, 1.03) |
|                        | 0.73         | 0.75         | 0.64         |
| Endoscopic remission   | (0.43, 1.25) | (0.48, 1.15) | (0.37, 1.10) |

Log-transformed data were used for CRP analysis. Odds ratios <1 signify that a decrease in CRP or PMS (per unit) is associated with an increase in the odds of response.

\* $P < 0.05$ .

BID, twice daily; CI, confidence interval; CRP, C-reactive protein; N, number of patients in the analysis population; PMS, partial Mayo score.

**SUPPLEMENTARY TABLE 5.** ROC Analysis For Ability of TNFi To Predict Clinical and Endoscopic Outcomes At Weeks 8 and 16 of Tofacitinib Induction (Full Analysis Set, Observed Case Analysis).

|                              | AUC   | SE    | 95% CI     | Sensitivity | Specificity | PPV   | NPV   |
|------------------------------|-------|-------|------------|-------------|-------------|-------|-------|
| Efficacy outcomes at Week 8  |       |       |            |             |             |       |       |
| Clinical response            | 0.576 | 0.018 | 0.54, 0.61 | 0.545       | 0.608       | 0.693 | 0.451 |
| Clinical remission           | 0.613 | 0.021 | 0.57, 0.65 | 0.669       | 0.557       | 0.261 | 0.878 |
| Endoscopic improvement       | 0.599 | 0.018 | 0.56, 0.63 | 0.620       | 0.578       | 0.410 | 0.763 |
| Endoscopic remission         | 0.639 | 0.029 | 0.58, 0.70 | 0.742       | 0.535       | 0.112 | 0.963 |
| Efficacy outcomes at Week 16 |       |       |            |             |             |       |       |
| Clinical response            | 0.524 | 0.031 | 0.46, 0.59 | 0.426       | 0.623       | 0.612 | 0.437 |
| Clinical remission           | 0.587 | 0.053 | 0.48, 0.69 | 0.560       | 0.615       | 0.136 | 0.928 |
| Endoscopic improvement       | 0.528 | 0.043 | 0.44, 0.61 | 0.450       | 0.606       | 0.171 | 0.859 |
| Endoscopic remission         | 0.603 | 0.101 | 0.40, 0.80 | 0.800       | 0.406       | 0.026 | 0.991 |

AUC values between 0.9 and 1.0 = outstanding predictive value; between 0.8 and 0.9 = excellent predictive value; between 0.7 and 0.8 = acceptable predictive value; >0.5–0.7 = poor predictive value; ≤0.5 = no discrimination

AUC, area under the curve; CI, confidence interval; NPV, negative predictive value; PPV, positive predictive value; ROC, receiver operating characteristic; SE, standard error; TNFi, tumor necrosis factor inhibitor.



**SUPPLEMENTARY FIGURE 1.** A, Overview of the tofacitinib UC clinical program. Adapted from Winthrop KL, Melmed GY, Vermeire S, et al. *Inflamm Bowel Dis.* 2018;24:2258–65 (in accordance with the CC BY-NC license); B, overview of the patient population in this post hoc analysis.

\*Final complete efficacy assessment at Week 8/52. Treatment continued up to Week 9/53; †Clinical response in OCTAVE Induction 1 and 2 was defined as a decrease from induction study baseline total Mayo score of  $\geq 3$  points and  $\geq 30\%$ , plus a decrease in rectal bleeding subscore of

$\geq 1$  point or an absolute rectal bleeding subscore of 0 or 1; ‡Study A3921139 (OCTAVE Open) was ongoing at the time of this analysis;

§Remission was defined as a total Mayo score of  $\leq 2$  with no individual subscore  $> 1$ , and a rectal bleeding subscore of 0 (centrally read).

BID, twice daily; N, number of patients treated in each treatment group; UC, ulcerative colitis.

A

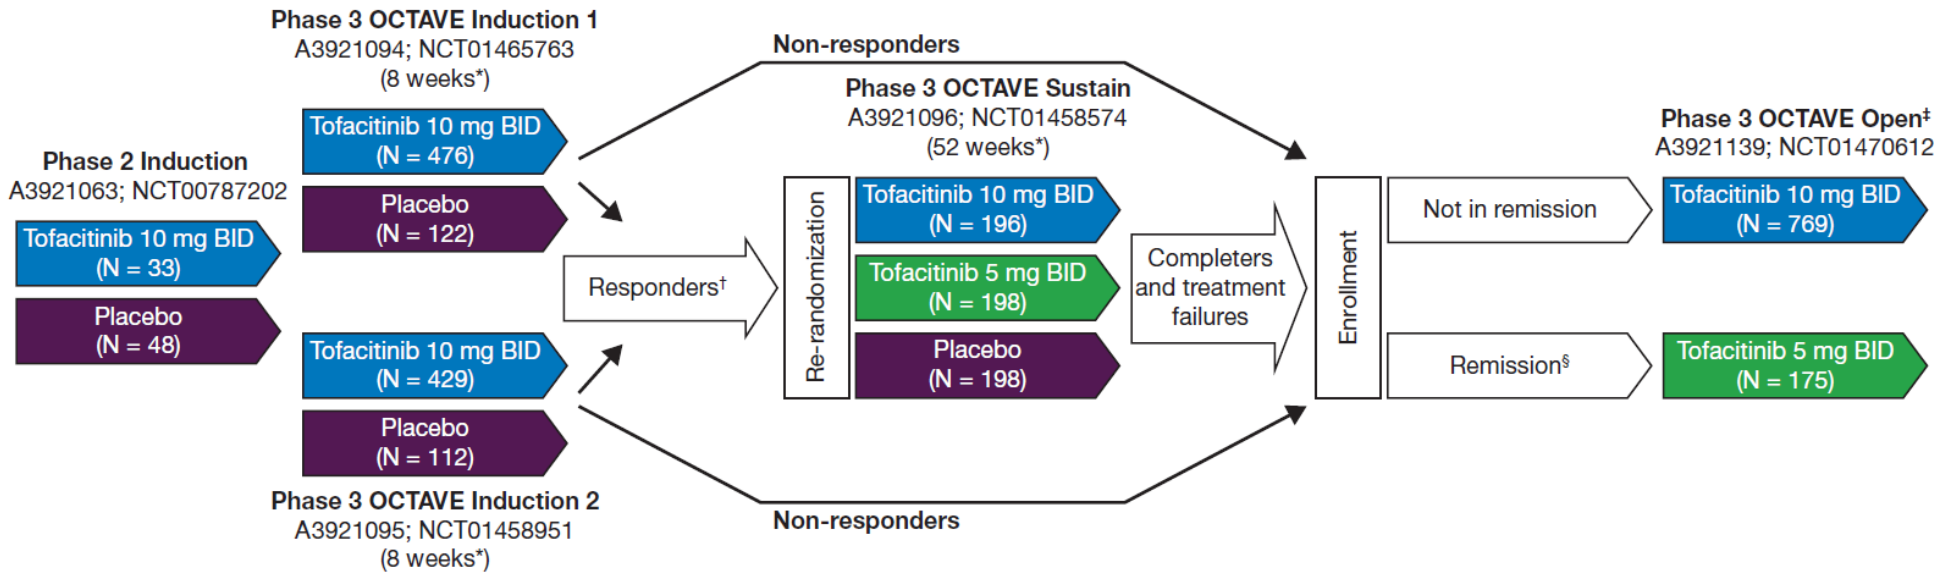

B

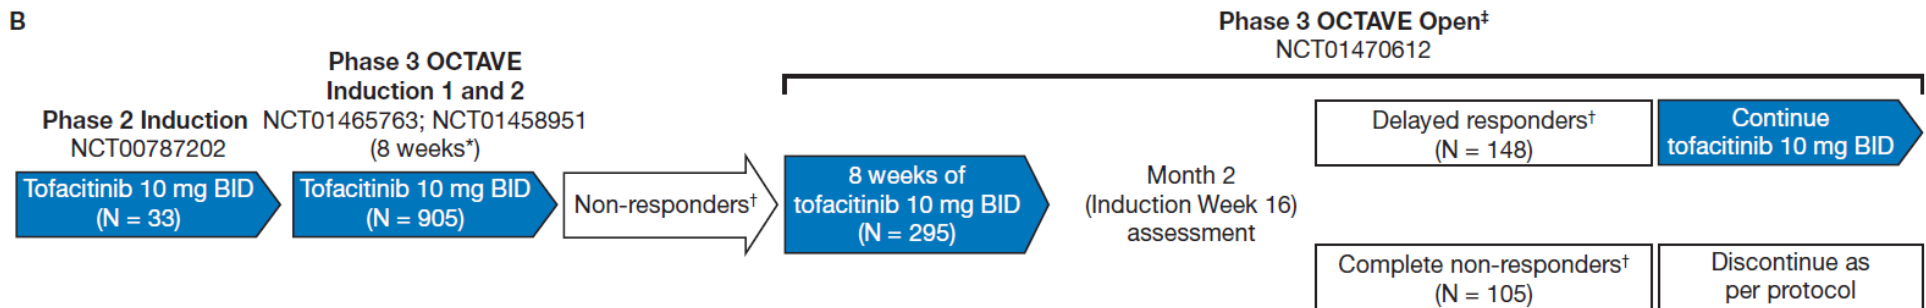

**SUPPLEMENTARY FIGURE 2.** Evaluation of CRP at Week 4 of the Phase 2 study in patients receiving tofacitinib 10 mg BID (N = 28), stratified by whether patients achieved clinical and endoscopic outcomes at induction Week 8 (full analysis set, observed case analysis).

BID, twice daily; CRP, C-reactive protein; N, number of patients with non-missing data in each category; SD, standard deviation.

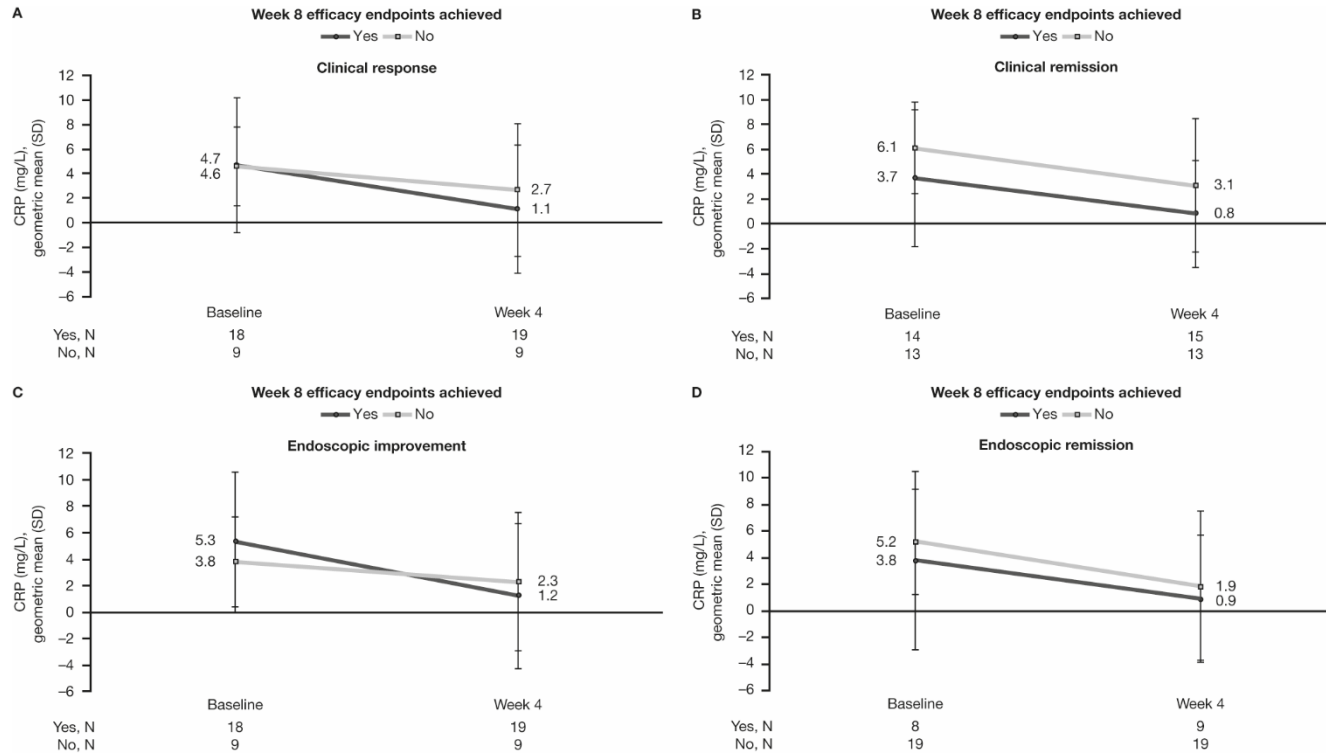

**SUPPLEMENTARY FIGURE 3.** PMS at Week 4 of the Phase 2 study in patients receiving tofacitinib 10 mg BID (N = 28), stratified by whether patients achieved clinical and endoscopic outcomes at induction Week 8 (full analysis set, observed case analysis). BID, twice daily; N, number of patients with non-missing data in each category; PMS, partial Mayo score; SD, standard deviation.

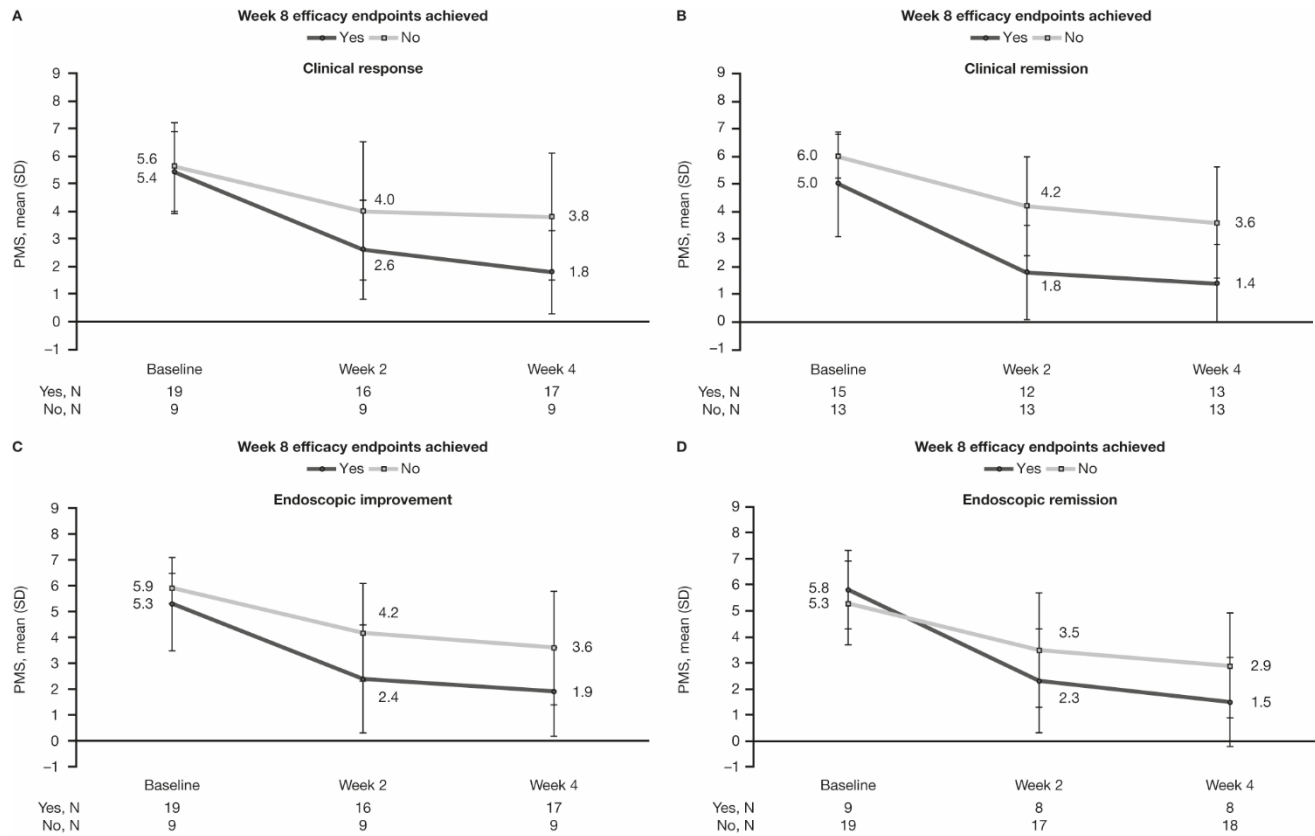

**SUPPLEMENTARY FIGURE 4.** ROC curves for prior TNFi failure as a predictor of clinical and endoscopic outcomes (full analysis set, observed case analysis): A, at induction Week 8; B, at induction Week 16. ROC, receiver operating characteristic; TNFi, tumor necrosis factor inhibitor.

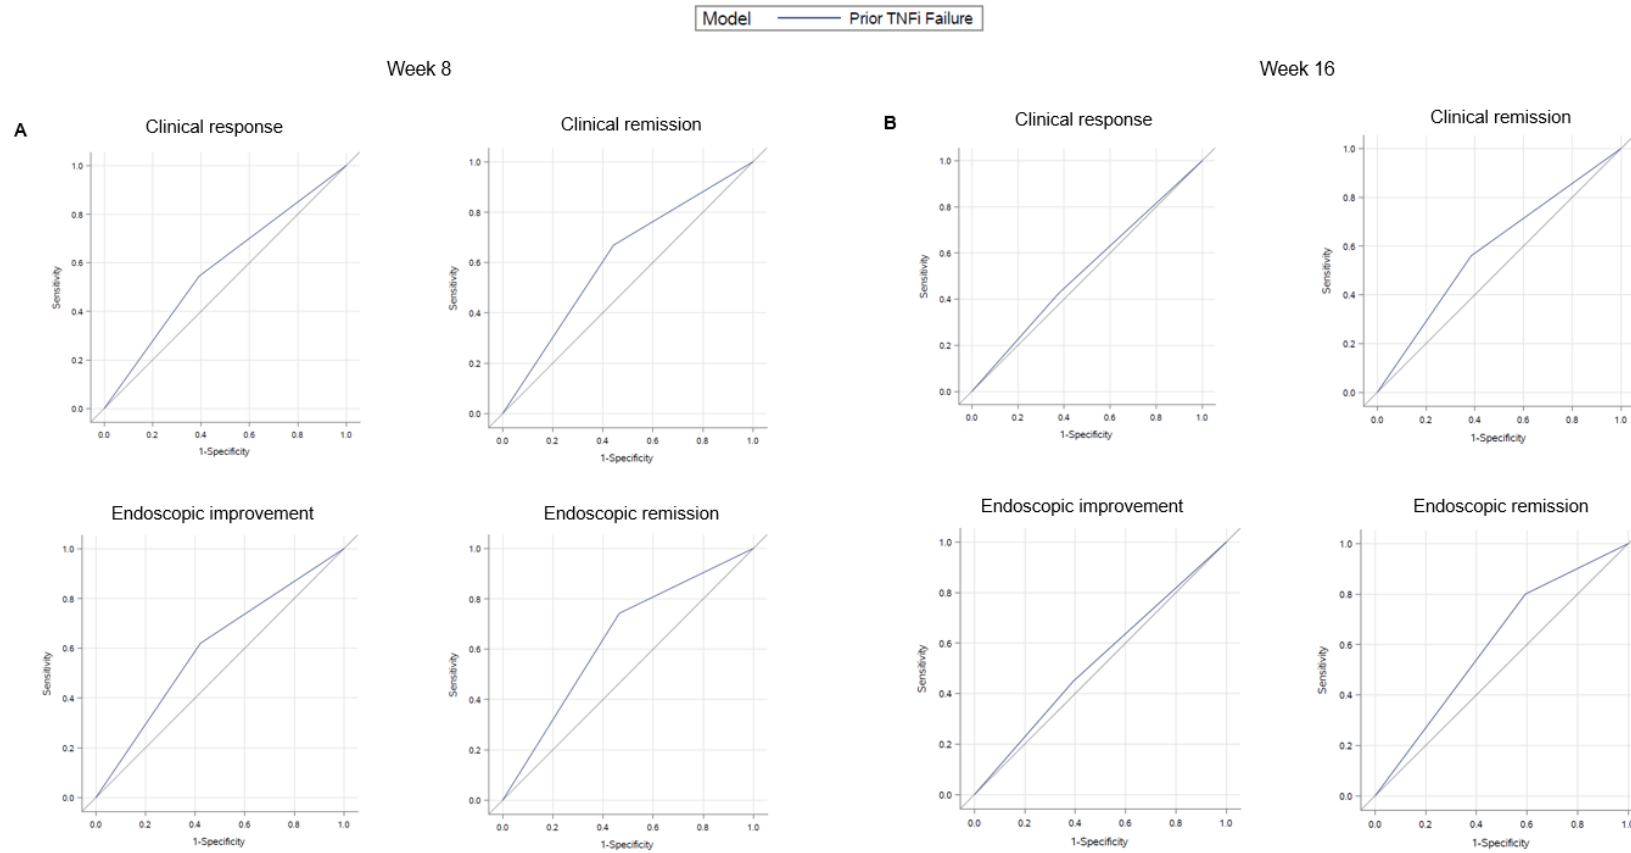

## REFERENCES

1. Sandborn WJ, Su C, Sands BE, et al. Tofacitinib as induction and maintenance therapy for ulcerative colitis. *N Engl J Med*. 2017;376:1723–36.
2. Lichtenstein GR, Loftus Jr EV, Wei SC, et al. Tofacitinib, an oral, small-molecule Janus kinase inhibitor, in the treatment of ulcerative colitis: analysis of an open-label, long-term extension study with up to 5.9 years of treatment (abstract). *J Crohns Colitis*. 2020;14(Suppl 1):S100–1 (DOP61).
